# Supplementary material for: Graphene Templated DNA Arrays and Biotin-Streptavidin Sensitive Bio-Transistors Patterned by Dynamic Self-Assembly of Polymeric Films Confined within a Roll-on-Plate Geometry
Source: PubMed Central journal article supplement (PMC7466610; doi:10.3390/nano10081468), 2020-07-27
Supplement: nanomaterials-10-01468-s001.pdf [file nanomaterials-10-01468-s001.pdf]

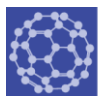

## Supplementary Materials

# Graphene Templated DNA Arrays and Biotin-Streptavidin Sensitive Bio-Transistors Patterned by Dynamic Self-Assembly of Polymeric Films Confined within a Roll-on-Plate Geometry

Sangheon Jeon <sup>1,†</sup>, Jihye Lee <sup>1,†</sup>, Rowoon Park <sup>1,†</sup>, Jeonghwa Jeong <sup>1</sup>, Min Chan Shin <sup>1</sup>, Seong Un Eom <sup>2</sup>, Jinyoung Park <sup>3,\*</sup>, and Suck Won Hong <sup>1,\*</sup>

<sup>1</sup> Department of Cogno-Mechatronics Engineering, Department of Optics and Mechatronics Engineering, College of Nanoscience and Nanotechnology, Pusan National University, Busan 46241, Korea; sangheon.jn@gmail.com (S.J.); jihyelee970@gmail.com (J.L.); rowoon.p153@gmail.com (R.P.); 2jeong.s.o@gmail.com (J.J.); mch3024@gmail.com (M.C.S.)

<sup>2</sup> Substrate & Material Laboratory, LG Innotek Co., Ltd., Gumi 39419, Korea; sueom89@gmail.com

<sup>3</sup> School of Applied Chemical Engineering, Kyungpook National University, Daegu 41566, Korea

\* Correspondence: jinpark@knu.ac.kr (J.P.); swhong@pusan.ac.kr (S.W.H.)

† These authors contributed equally to this work.

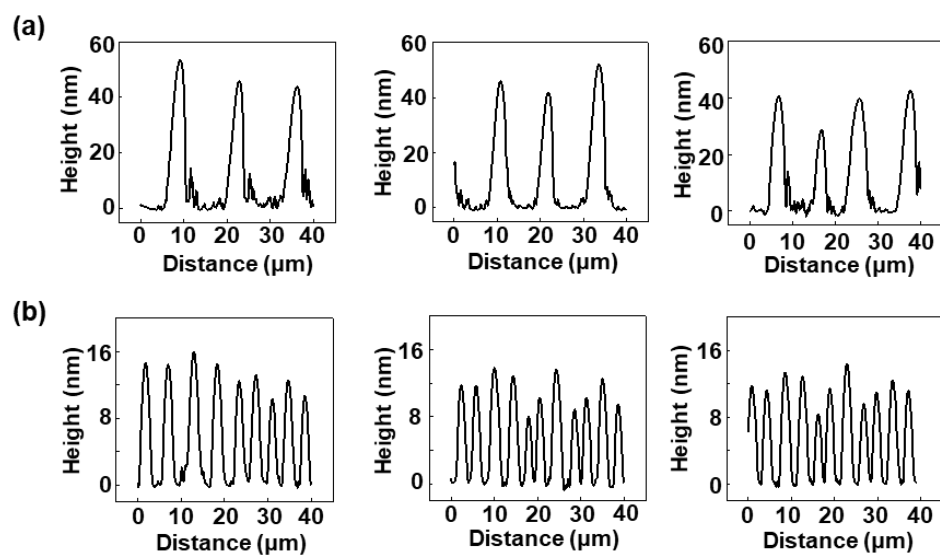

**Figure S1.** The height profiles of the periodic PMMA stripes obtained from different concentration,  $C = 0.5 \text{ mg mL}^{-1}$  (a) and  $0.125 \text{ mg mL}^{-1}$  (b).

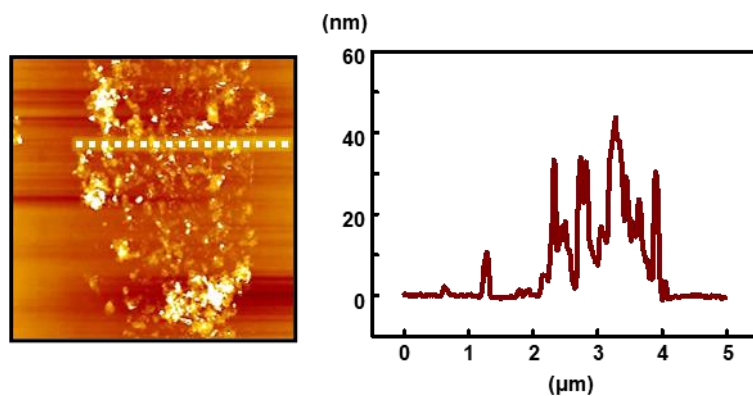

**Figure S2.** Close-up AFM images of GO-AuNPs stripe corresponding to the one portion of Figure 3e. The typical height of the GO-AuNPs stripe was  $\sim 30 \text{ nm}$ .

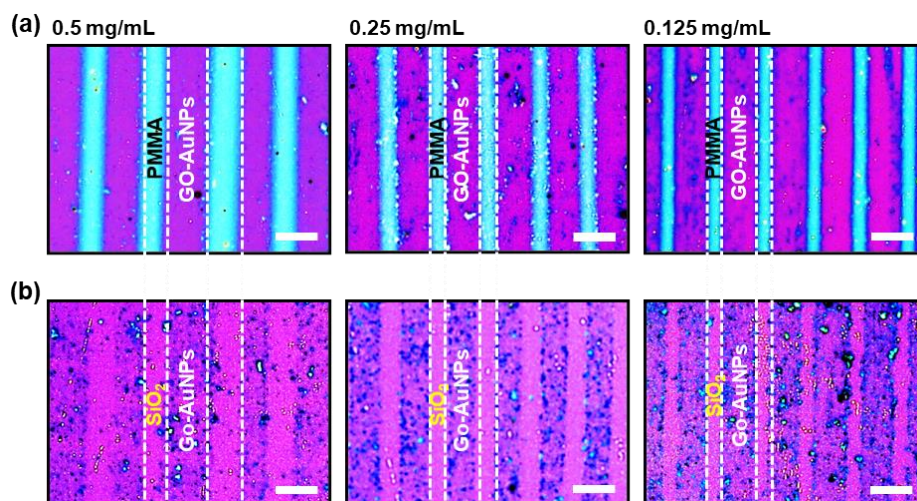

**Figure S3.** Patterned arrays of GO/AuNPs by lift-off process of PMMA after the template-assisted deposition on the SiO<sub>2</sub>/Si substrate. (a) Optical micrographs after the GO/AuNPs deposition on the patterned PMMA stripes with different concentrations of 0.5, 0.25, and 0.125 mg mL<sup>-1</sup>. (b) After the removal of PMMA using an organic solvent. The scale bars are 10  $\mu$ m.

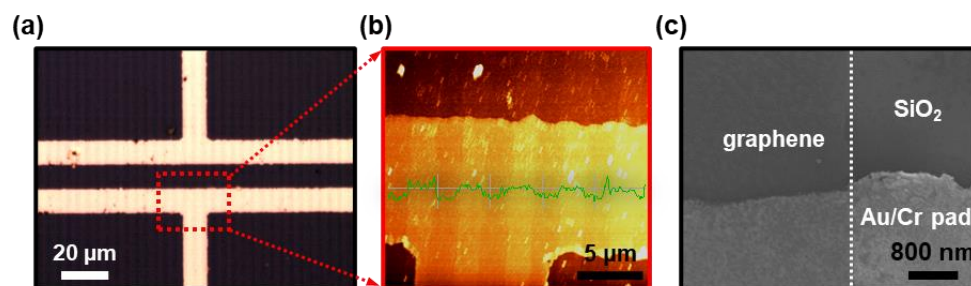

**Figure S4.** (a) Typical optical micrograph of micropatterned graphene channels on pair of Au/Cr electrodes, in which the back-gated multichannel GFET was built on the SiO<sub>2</sub>/Si substrate. (b) AFM image and height profile of micropatterned graphene, measured from the marked area in (a). (c) A magnified SEM image shows the graphene conformably integrated on the electric pads after the oxygen plasma and the removal of PMMA etch masks.

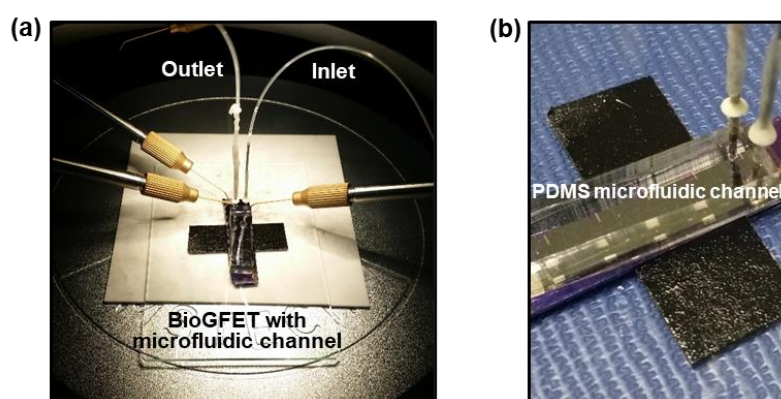

**Figure S5.** (a) A photograph of the BioGFET integrated with a microfluidic system and the probing accesses. (b) A magnified view of the BioGFET as illustrated in Figure 6c.

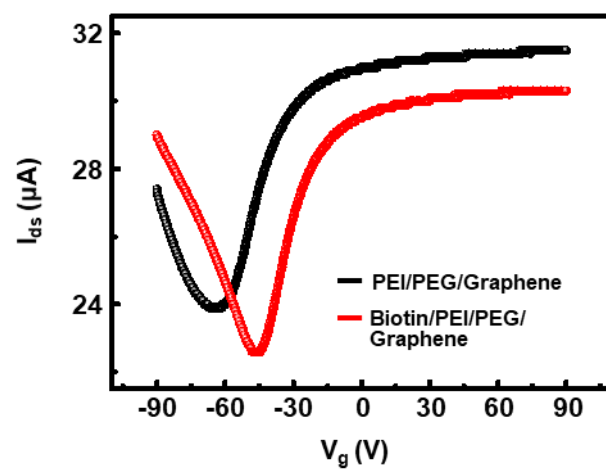

**Figure S6.** Transfer characteristics after the PEI/PEG polymer coating on the graphene channels (black), and transfer characteristics after the biotinylation on the active channels in BioGFET (red).
